# Supplementary material for: Combining single-cell transcriptomics and CellTagging to identify differentiation trajectories of human adipose-derived mesenchymal stem cells
Source: PubMed Central journal article supplement (PMC9890798; doi:10.1186/s13287-023-03237-3), 2023-02-01

**A**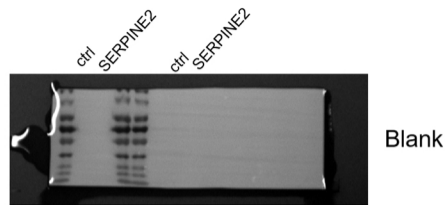**B**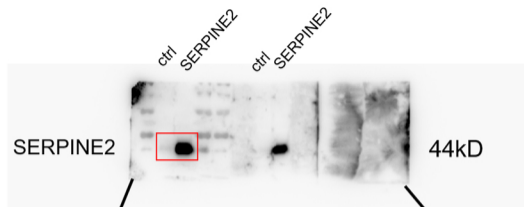**C**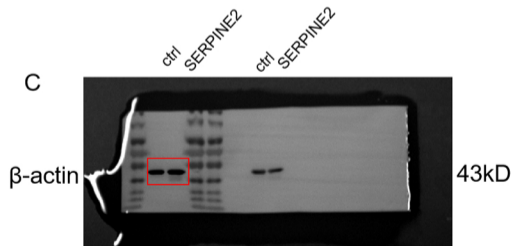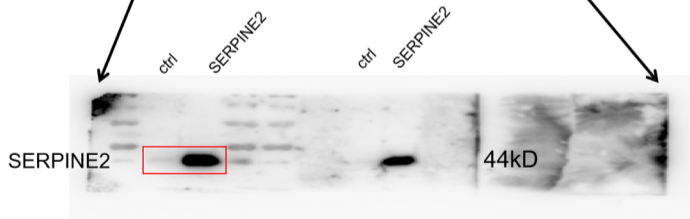

Supplement: 13287_2023_3237_MOESM1_ESM.pdf [file 13287_2023_3237_MOESM1_ESM.pdf]
